# Supplementary material for: Endogenous DKK1 and FRZB Regulate Chondrogenesis and Hypertrophy in Three-Dimensional Cultures of Human Chondrocytes and Human Mesenchymal Stem Cells
Source: PubMed Central journal article supplement — Stem Cells Dev. 2016 Dec 1;25(23):1808–17. doi: 10.1089/scd.2016.0222 (PMC5124737; doi:10.1089/scd.2016.0222), 2016-12-01
Supplement: Supp_Figure2.pdf [file Supp_Figure2.pdf]

| VHH      | Sequence                                                                                                                                                                 |
|----------|--------------------------------------------------------------------------------------------------------------------------------------------------------------------------|
| TSF-1C5  | QVQLQESGGGLVQAGGSLRLSCVAASGRTPSSVAMGWFRQAPGKQRELVAGISRGGTTNYL<br>DSVKERFTISRDNKNTVYLQMNLIKPEDTAVYYCNAVDFLDRITNYWGRGTQVTVSSEPK<br>TPKQPAAASGSLEQKLISEEDLNGAAHHHHHHGAA     |
| TSF-1G5  | QVQLVESGGDLVQPGGSLRLSCAASGIFSLNAVGVYRQAPGKQRELVARIMGGGTDYA<br>DSVKGRFTISRDNKNTVYLQMNLIKPEDTAVYYCNARPVLTRLDYWGQGNQVTVSSAA<br>ASGSLEQKLISEEDLNGAAHHHHHHGAA                 |
| TSF-1H5  | QVQLVESGGGLVQPGGSLRLSCAASGSIFSINTMGWYRQAPGKPRELVATITRGAMINYAD<br>SVQGRFTISRDNKNTVYLQMNLIKPEDTAVYYCNKGLQRTSLGIIRFDSWGGTRVTVS<br>SAAASGSLEQKLISEEDLNGAAHHHHHHGAA           |
| TSF-1F7  | <b>QVQLQESGGGLVQPGGSLRLSCAASGIFSLNAVGVYRQAPGKQRELVAIAGGGRT<br/>NYADSVKGRFTISRDNKNTVYLQMNLIKPEDTAVYYCNAKSPWNTIPYWGHTQVT<br/>VSSEPKTPKQPAAASGSLEQKLISEEDLNGAAHHHHHHGAA</b> |
| TSF-1G11 | QVQLQDSGGGLVQPGGSLRLSCAASGFTSSAMSVMWRQAPGKLEWVSSINKGGGITY<br>ADSVKGRFTISRDNKNTVYLQMNLIKPEDTAVYYCAKSRFYGSLGAADYRGGGTQVT<br>VSSEPKTPKQPAAASGSLEQKLISEEDLNGAAHHHHHHGAA      |

**SUPPLEMENTARY FIG. S2.** Amino acid sequence alignment of VHH targeting FRZB derived from nonimmune VHH library of BAC BV. Sequencing of the 8 isolated clones resulted in the identification of five unique clones against sFRP-3. The sequences of TSF-1F7 are highlighted in *bold*. FRZB, frizzled-related protein.
