# Supplementary material for: Endogenous DKK1 and FRZB Regulate Chondrogenesis and Hypertrophy in Three-Dimensional Cultures of Human Chondrocytes and Human Mesenchymal Stem Cells
Source: PubMed Central journal article supplement — Stem Cells Dev. 2016 Dec 1;25(23):1808–17. doi: 10.1089/scd.2016.0222 (PMC5124737; doi:10.1089/scd.2016.0222), 2016-12-01
Supplement: Supp_Figure3.pdf [file Supp_Figure3.pdf]

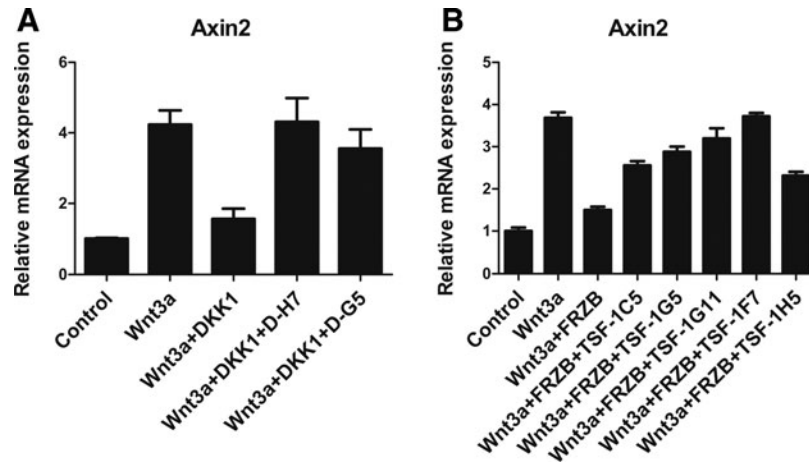

**SUPPLEMENTARY FIG. S3.** Selection of most efficient (A) DKK1 and (B) FRZB neutralizing VHH. Human articular chondrocytes were stimulated with Wnt3a or Wnt3a plus DKK1/FRZB, or Wnt3a plus DKK1/FRZB combination with different neutralizing VHH; qPCR was used to measure the WNT target gene AXIN2 expression. qPCR, quantitative polymerase chain reaction.
