# Supplementary material for: Endogenous DKK1 and FRZB Regulate Chondrogenesis and Hypertrophy in Three-Dimensional Cultures of Human Chondrocytes and Human Mesenchymal Stem Cells
Source: PubMed Central journal article supplement — Stem Cells Dev. 2016 Dec 1;25(23):1808–17. doi: 10.1089/scd.2016.0222 (PMC5124737; doi:10.1089/scd.2016.0222), 2016-12-01
Supplement: Supp_Figure4.pdf [file Supp_Figure4.pdf]

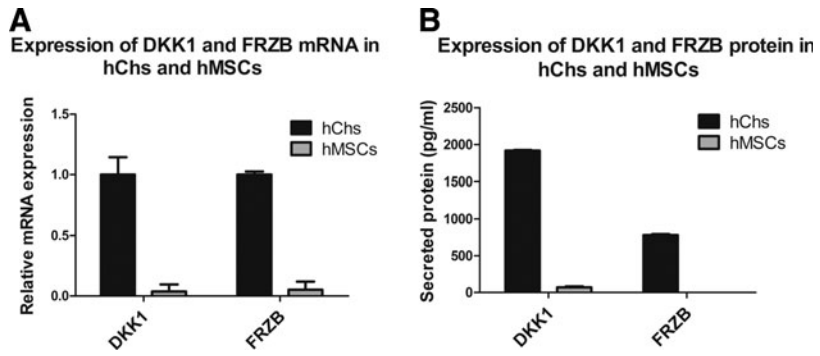

**SUPPLEMENTARY FIG. S4.** Expression of DKK1 and FRZB in hChs and hMSCs. mRNA levels were determined by qRT-PCR analysis. The expression of *DKK1* and *FRZB* was standardized to *GAPDH* expression (**A**). In addition, secretion of DKK1 and FRZB was analyzed using ELISA (**B**). Bars show the mean  $\pm$  standard deviation. ELISA, enzyme-linked immunosorbent assay; hChs, human chondrocytes; hMSCs, human mesenchymal stem cells; RT, real time.
