# Supplementary material for: Endogenous DKK1 and FRZB Regulate Chondrogenesis and Hypertrophy in Three-Dimensional Cultures of Human Chondrocytes and Human Mesenchymal Stem Cells
Source: PubMed Central journal article supplement — Stem Cells Dev. 2016 Dec 1;25(23):1808–17. doi: 10.1089/scd.2016.0222 (PMC5124737; doi:10.1089/scd.2016.0222), 2016-12-01
Supplement: Supp_Figure5.pdf [file Supp_Figure5.pdf]

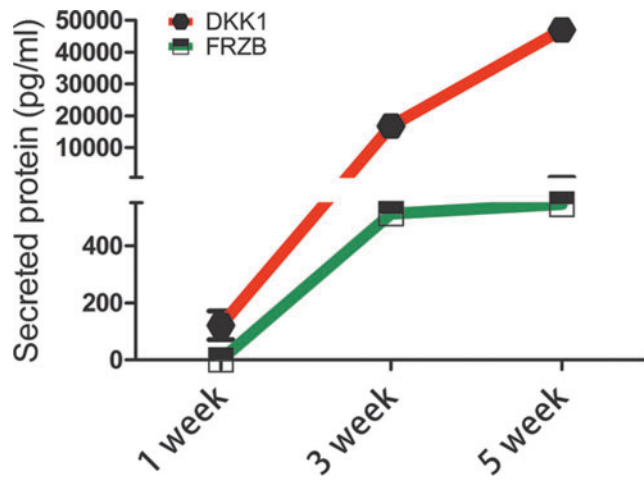

**SUPPLEMENTARY FIG. S5.** The protein expression of DKK1 and FRZB during chondrogenesis of hMSCs. hMSCs were cultured in chondrogenic differentiation medium containing dexamethasone and TGF- $\beta$ . Culture medium was collected at indicated time point. DKK1 and FRZB protein levels were analyzed using ELISA.
