# Supplementary material for: Endogenous DKK1 and FRZB Regulate Chondrogenesis and Hypertrophy in Three-Dimensional Cultures of Human Chondrocytes and Human Mesenchymal Stem Cells
Source: PubMed Central journal article supplement — Stem Cells Dev. 2016 Dec 1;25(23):1808–17. doi: 10.1089/scd.2016.0222 (PMC5124737; doi:10.1089/scd.2016.0222), 2016-12-01
Supplement: Supp_Figure6.pdf [file Supp_Figure6.pdf]

### Redifferentiation of human chondrocytes

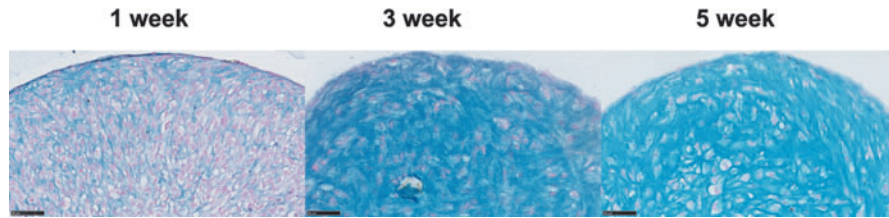

**SUPPLEMENTARY FIG. S6.** Alcian blue staining of 3D pellet cultures shows clear GAG production after 3 weeks. After 5 weeks of differentiation, cartilage characteristics are clearly visible: chondrocytes are present in lacunae surrounded by GAGs. GAG, glycosaminoglycan.
