# Supplementary material for: Endogenous DKK1 and FRZB Regulate Chondrogenesis and Hypertrophy in Three-Dimensional Cultures of Human Chondrocytes and Human Mesenchymal Stem Cells
Source: PubMed Central journal article supplement — Stem Cells Dev. 2016 Dec 1;25(23):1808–17. doi: 10.1089/scd.2016.0222 (PMC5124737; doi:10.1089/scd.2016.0222), 2016-12-01
Supplement: Supp_Table1.pdf [file Supp_Table1.pdf]

SUPPLEMENTARY TABLE S1. FORWARD AND REVERSE PRIMERS USED FOR QUANTITATIVE REAL-TIME POLYMERASE CHAIN REACTION

| <i>Gene name</i> | <i>Primer sequence</i>                                             | <i>Product size</i> | <i>Annealing temperature (°C)</i> |
|------------------|--------------------------------------------------------------------|---------------------|-----------------------------------|
| <i>GAPDH</i>     | F: 5' CGCTCTCTGCTCCTCCTGTT 3'<br>R: 5' CCATGGTGTCTGAGCGATGT 3'     | 81                  | 60                                |
| <i>AXIN2</i>     | F: 5' AGTGTGAGGTCCACGGAAAC 3'<br>R: 5' CTGGTGCAAAGACATAGCCA 3'     | 103                 | 60                                |
| <i>RUNX2</i>     | F: 5' GGAGTGGACGAGGCAAGAGTTT 3'<br>R: 5' AGCTTCTGTCTGTGCCTTCTGG 3' | 133                 | 60                                |
| <i>MMP13</i>     | F: 5' AAGGAGCATGGCGACTTCT 3'<br>R: 5' TGGCCCAGGAGGAAAAGC 3'        | 72                  | 60                                |
| <i>COL10A1</i>   | F: 5' GAACTCCCAGCACGCAGAAT 3'<br>R: 5' CCTGTGGGCATTTGGTATCG 3'     | 121                 | 60                                |
| <i>DKK1</i>      | F: 5' AGTACTGCGCTAGTCCCACC 3'<br>R: 5' TCCTCAATTCTCCTCGGAA 3'      | 172                 | 60                                |
| <i>FRZB</i>      | F: 5' ACGGGACACTGTCAACCTCT 3'<br>R: 5' CGAGTCGATCCTTCCACTTC 3'     | 155                 | 60                                |

F, forward; R, reverse.
